# Supplementary material
Source: Elsevier journal article supplement (https://www.sciencedirect.com/science/article/pii/S0300893222000677)
Supplement: mmc1 [file mmc1.pdf]

De María R, et al. Temporal trends in characteristics, treatment, and outcomes of heart failure in octogenarians over two decades. *Revista Española de Cardiología*

**Table 1 of the supplementary data**

Discharge codes for cardiovascular hospitalizations

| Discharge diagnosis       | ICD9-CM codes                                                                            |
|---------------------------|------------------------------------------------------------------------------------------|
| Worsening heart failure   | 4280, 42820, 42823, 42833, 42841, 42843                                                  |
| Acute coronary syndrome   | 41000, 41001, 41011, 41021, 41031, 41041, 41051, 41061, 41071, 41081, 41091, 41181       |
| Arrhythmic events         | 4270, 4271, 4272, 4273, 4274, 4275                                                       |
| Syncope                   | 7802                                                                                     |
| Pulmonary thromboembolism | 41511, 41519                                                                             |
| Stroke                    | 43301, 43311, 43320, 43321, 43331, 43381, 43391, 43400, 43401, 43410, 43411, 4349, 43491 |

ICD9-CM, international classification of disease ninth version-clinical modification.

De María R, et al. Temporal trends in characteristics, treatment, and outcomes of heart failure in octogenarians over two decades. *Revista Española de Cardiología*

**Table 2 of the supplementary data**

Cox multivariable model: characteristics associated with 1-year mortality or CV hospitalizations

|                                                 | <b>Hazard ratio</b> | <b>95% confidence Interval</b> | <b>P</b>     |
|-------------------------------------------------|---------------------|--------------------------------|--------------|
| <b>Period 2006-2011 vs 1999-2005</b>            | <b>0.696</b>        | <b>0.546-0.889</b>             | <b>.0037</b> |
| <b>Period 2012-2018 vs 1999-2005</b>            | <b>0.612</b>        | <b>0.474-0.790</b>             | <b>.0002</b> |
| Age, per y                                      | 1.056               | 1.029-1.083                    | <.0001       |
| Sex, women vs Men                               | 1.089               | 0.910-1.304                    | .3511        |
| Left ventricular ejection fraction, per 5 units | 0.953               | 0.917-0.990                    | .0123        |
| Hypertensive vs other etiology                  | 0.820               | 0.637-1.056                    | .1235        |
| Ischemic vs other etiology                      | 1.115               | 0.913-1.362                    | .2853        |
| HF history > 6 mo                               | 1.173               | 0.996-1.424                    | .1076        |
| Body mass index, per 1 kg/m <sup>2</sup>        | 0.978               | 0.956-1.000                    | .0481        |
| Systolic blood pressure, per 5 mmHg             | 0.958               | 0.938-0.980                    | .0003        |
| Heart rate, per 5 bpm                           | 1.011               | 0.980-1.043                    | .4999        |
| NYHA class III-IV                               | 1.819               | 1.530-2.161                    | <.0001       |
| ≥1 HF admission previous year vs none           | 1.438               | 1.202-1.720                    | <.0001       |
| History of atrial fibrillation                  | 1.075               | 0.900-1.285                    | .4245        |
| Hypertension                                    | 1.204               | 0.991-1.464                    | .0620        |
| Diabetes                                        | 1.113               | 0.920-1.346                    | .2724        |
| Previous stroke/transient ischemic attack       | 1.131               | 0.861-1.486                    | .3768        |
| Furosemide                                      | 1.527               | 1.065-2.190                    | .0231        |
| Renin-angiotensin system inhibitors             | 0.819               | 0.672-0.999                    | .0490        |
| Beta-blockers                                   | 0.781               | 0.644-0.946                    | .0115        |
| Mineralocorticoid receptor antagonist           | 0.754               | 0.635-0.895                    | .0013        |

**De María R, et al. Temporal trends in characteristics, treatment, and outcomes of heart failure in octogenarians over two decades. *Revista Española de Cardiología***

|                     |       |             |       |
|---------------------|-------|-------------|-------|
| Non HF polypharmacy | 1.221 | 1.019-1.463 | .0308 |
| ICD/CRT-D           | 1.357 | 1.046-1.761 | .0217 |

ICD/CRT-D, implantable cardioverter defibrillator/cardiac resynchronization therapy-defibrillator.

**De María R, et al. Temporal trends in characteristics, treatment, and outcomes of heart failure in octogenarians over two decades. *Revista Española de Cardiología***

**Appendix of the supplementary data**

**Heart Failure Working Group, Italian Association of Hospital Cardiologists:** M. Iacoviello (Chairperson), M. Marini (Co-Chairperson), M. Benvenuto, L. Cassaniti, M. Gori, A. Municinò

**Coordinating Center:** ANMCO Research Center, Fondazione per il Tuo cuore, Firenze (A.P. Maggioni, M. Gorini, I. Cangioli)

**Participating Centers and Investigators:** *Piemonte* Ciriè (M.C. Orlando, G. Senatore), Ivrea (E. Pelissero), Moncalieri (F. Rabajoli), Orbassano (L. Montagna, M.G. Perrelli), Torino Ospedale Mauriziano Umberto I (I. Parrini), Torino Ospedale San Giovanni Bosco (C. Calcagnile, P. Noussan), *Lombardia* Bergamo ASST Papa Giovanni XXIII (V. Duino), Brescia ASST Spedali Civili (A. Ravera), Brescia Ist. Osp. Fond. Poliambulanza (L. Caprini, C. Cuccia), Busto Arsizio (R. Grassini), Crema (C. Pedrinazzi), Gavardo (M. Pernigo), Legnano (C. Inserra, M. D'Urbano), Lumezzane (E. Zanelli, S. Scalvini), Merate (S. Maggiolini), Milano ASST Osp. Metropolitan Niguarda Cardiologia 1 - Emodinamica (A. Sacco, F. Oliva), Milano ASST Osp. Metropolitan Niguarda Cardiologia 2 – Insuff. Card. e Trapianto (A.F. Giglio, M. Frigerio), Milano ASST Osp. Metropolitan Niguarda Diagnosi e Cure Terr. Malattie Cardiache (G. Mombelli, A. Alberti), Milano ASST Santi Paolo e Carlo - PO San Carlo (O. Agostoni, A. Mafrici), Milano Osp. San Raffaele (G. Galati), Milano Centro Cardiologico Monzino (L. Salvini), Montescano (G. Guazzotti, E. Traversi), Monza Osp. San Gerardo (A. Vincenzi), Monza Policlinico (A. Mortara, P. Delfino), Pavia Fond. IRCCS Policl. San Matteo (L. Scelsi, L. Oltrona Visconti), Pavia ICS Maugeri IRCCS (M. De Salvo, G. Forni), Rho – frazione Passirana (A. Frisinghelli), Rozzano (D. Pini, B. Reimers), Saronno (D. Nassiacos, S. Meloni), Seriate (A. Cafro), Treviglio (D. Belloli, P.C. Sganzerla), Varese Osp. di Circolo e Fondazione Macchi (F. Morandi), Vizzolo Predabissi (P. Quorso), *Veneto* Arzignano (C. Paolini, C. Bilato), Chioggia (G. Vianello), Feltre (F. De Cian), Mirano (A. Zanocco, S. Saccà), San Bonifacio (G.M.

**De María R, et al. Temporal trends in characteristics, treatment, and outcomes of heart failure in octogenarians over two decades. *Revista Española de Cardiología***

Frigo, M. Anselmi), Treviso Ospedale Ca' Foncello (S. Giacomelli), *Friuli Venezia Giulia* Pordenone (E. Loiudice, D. Pavan), Trieste ASUITS – Polo Cardiologico Cattinara (M. Merlo, G. Sinagra), Trieste ASUGI (G. Russo, A. Di Lenarda), Udine POU Santa Maria della Misericordia (D. Miani, A. Proclemer), *Liguria* Genova Osp. Policl. San Martino (M. Canepa, F. Chiarella), Genova Osp. Villa Scassi (F. Mainardi, P. Rubartelli), Genova Osp. Padre Antero Micone (S. Costa), *Emilia Romagna* Bologna Osp. Maggiore (P. Gallo, G. Casella), Bologna Osp. Policl. S. Orsola-Malpighi (E.R. Cosentino, C. Borghi), Bologna Ospedale Bellaria (P. Prestinenzi, S. Urbinati), Carpi (C. Mariani, S. Cappelli), Cesena (M. Bartolotti, M. Marconi), Ferrara (A. Fucili, R. Ferrari), Forlì (E. Gardini, M. Galvani), Reggio Emilia PO Santa Maria Nuova – AUSL RE IRCCS (A. Navazio, E. Guerri, V. Zanasi), Riccione (P. Del Corso, G. Piovaccari), Rimini Ospedale Infermi (F. Bologna, G. Piovaccari), Sassuolo (F. Menozzi), *Toscana* Cortona (F. Cosmi), Empoli (F. Venturi, A. Del Rosso), Firenze Osp. Santa Maria Nuova (F. Grossi, M. Milli), Firenze Osp. San Giovanni Di Dio (C. Minneci), Firenze AOU Careggi (A. Pratesi, A. Ungar), Pescia (L. Garritano), Pisa FTGM – Stabilimento di Pisa (R. Poletti), Pistoia (M. Parigi), Poggibonsi (G. Scopelliti, A. D'Arpino), Siena (F.A. Pagliaro, S. Valente), *Umbria* Assisi (G. Bardelli, R. Panciarola), Città di Castello (D. Severini, A. Murrone), Perugia Azienda Ospedaliera (E. Carluccio, G. Ambrosio), Perugia Ex Ospedale Grocco (L. Filippucci, C. Martino), *Marche* Ancona Ospedali Riuniti (I. Battistoni, G.P. Perna), Ascoli Piceno Osp. Gen.le Prov.le C.G. Mazzoni (F. Travaglini), Fermo (E. Savini, D. Gabrielli), *Lazio* Anzio (L. Prosseda, N. Di Belardino), Ariccia (P. Midi, G. Pajes), Pomezia (M. Lo Presti), Roma Policl. Umberto I (M. Mancone), Roma Osp. San Camillo (G. Pulignano, M. Uguccioni, F. Albi), Roma AO San Giovanni Addolorata (N. Pagnoni, G.F. Mureddu, A. Battagliese), Roma Ospedale Santo Spirito (A.B. Scardovi), Roma P.O. San Filippo Neri-ASL Roma1 (S.A. Di Fusco, F. Colivicchi), Roma Policl. Casilino (C. Tota), Roma Clinica Città di Roma (S. Refice, T. Nejat), *Abruzzo* Teramo (L.L. Piccioni, C. Napoletano), *Campania* Avellino (V. Palmieri), Battipaglia (L. Tedesco), Eboli (L. Lardo), Frattamaggiore (C. Lirato, F. Piemonte), Napoli AOU Federico II (M.A. Losi, D. Bonaduce), Salerno AOU S. Giovanni di Dio-Ruggi D'Aragona (A. Gigantino, G. Padula), Santa Maria Capua a Vetere (G. Cicia), *Puglia* Bisceglie (M. Liotino), Brindisi (A. De Castro),

**De María R, et al. Temporal trends in characteristics, treatment, and outcomes of heart failure in octogenarians over two decades. *Revista Española de Cardiología***

Foggia Ospedali Riuniti (N.D. Brunetti), *Calabria* Vibo Valentia (F. Sturniolo), *Sicilia* Augusta (C. Ruperto), Avola (M.T. Giannone), Catania P.O. Garibaldi Centro (M.B. Zisa, S. Felis), Catania Az. Osp. Cannizzaro (M. Catalano, F. Amico, S. Giubilato), Catania Policl. Rodolico (G. Leonardi, G. Montana), Catania P.O. Garibaldi-Nesima (G.M. Francese, M.M. Gulizia), Cefalù (D. Armata, T. Cipolla), Lentini (S. Arcidiacono, V. Crisci), Messina Policlinico G. Martino (F. Napoli, A. Saitta), Palermo AOR Villa Sofia-Cervello PO Villa Sofia (A.M. Floresta, F. Ingrilli), Ragusa Ospedale Giovanni Paolo II (G. Iabichella, A. Nicosia), *Sardegna* Cagliari Azienda Osp. G. Brotzu (M. Corda), Nuoro Ospedale San Francesco (V. Orrù).
